# Supplementary material for: Association of SLC12A1 and GLUR4 Ion Transporters with Neoadjuvant Chemoresistance in Luminal Locally Advanced Breast Cancer
Source: MDPI journal article supplement (doi:10.3390/ijms242216104), 2023-11-09
Supplement: s1 [file s1]

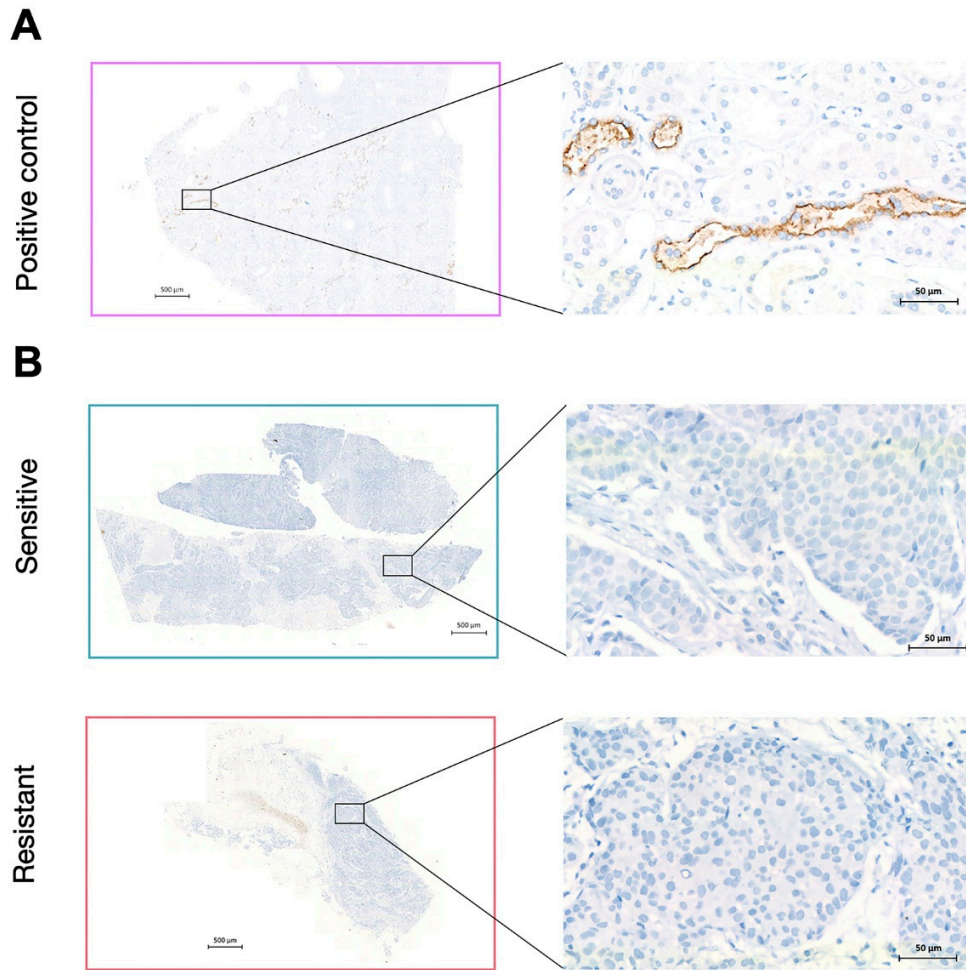

**Figure S1.** *SLC12A1* protein, NKCC2, was not detected in breast cancer tissues using immunohistochemistry.

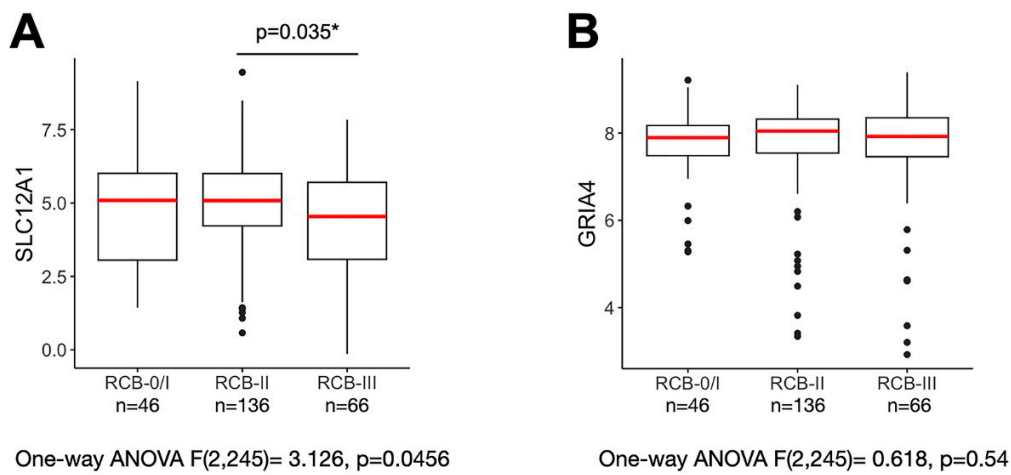

**Figure S2.** Gene expression evaluation of candidate resistance biomarkers *SLC12A1* and *GRIA4* across the RCB classes from the microarray GSE25066.

**Table S1.** Baseline characteristics of luminal breast cancer patients included in the RNA sequencing analysis (n=12).

| Patient ID | Age | Estrogen Receptor | Progesterone Receptor | HER2     | %Ki67 | Clinical Stage | Subtype            | RCB index | RCB class | Response  |
|------------|-----|-------------------|-----------------------|----------|-------|----------------|--------------------|-----------|-----------|-----------|
| BC1        | 52  | Positive          | Positive              | Negative | 60    | IIIB           | Luminal B<br>HER2- | 3.301     | RCB-III   | Resistant |
| BC2        | 66  | Positive          | Positive              | Positive | 90    | IIB            | Luminal B<br>HER2+ | 3.889     | RCB-III   | Resistant |
| BC3        | 52  | Positive          | Positive              | Negative | 18    | IIIA           | Luminal A          | 5.752     | RCB-III   | Resistant |
| BC4        | 50  | Positive          | Positive              | Negative | 25    | IIIA           | Luminal B<br>HER2- | 2.617     | RCB-II    | Resistant |
| BC5        | 56  | Positive          | Positive              | Negative | 35    | IIIA           | Luminal B<br>HER2- | 4.334     | RCB-III   | Resistant |
| BC6        | 42  | Positive          | Positive              | Negative | 30    | IIB            | Luminal B<br>HER2- | 3.65      | RCB-III   | Resistant |
| BC7        | 47  | Positive          | Positive              | Negative | 80    | IIIA           | Luminal B<br>HER2- | 1.237     | RCB-I     | Sensitive |
| BC8        | 43  | Positive          | Positive              | Negative | 10    | IIIA           | Luminal A          | 4.199     | RCB-III   | Resistant |
| BC9        | 68  | Positive          | Positive              | Positive | 50    | IIIA           | Luminal B<br>HER2+ | 0         | RCB-0     | Sensitive |

|      |    |          |          |          |    |      |                       |       |        |           |
|------|----|----------|----------|----------|----|------|-----------------------|-------|--------|-----------|
| BC10 | 48 | Negative | Positive | Positive | 50 | IIIB | Luminal<br>B<br>HER2+ | 0     | RCB-0  | Sensitive |
| BC11 | 40 | Negative | Positive | Negative | 60 | IIB  | Luminal<br>B<br>HER2- | 0     | RCB-0  | Sensitive |
| BC12 | 39 | Positive | Positive | Positive | 50 | IIIA | Luminal<br>B<br>HER2+ | 3.154 | RCB-II | Resistant |

Abbreviations: HER2, human epidermal growth factor receptor-2; RCB, residual cancer burden.
